# Supplementary material
Source: PubMed Central journal article supplement (PMC7199167)
Supplement: jamapediatr-174-e200593-s001.pdf [file jamapediatr-174-e200593-s001.pdf]

## Supplementary Online Content

Stoll BJ, Puopolo KM, Hansen NI, et al; the Eunice Kennedy Shriver National Institute of Child Health and Human Development Neonatal Research Network. Early-onset neonatal sepsis 2015 to 2017, the rise of *Escherichia coli*, and the need for novel prevention strategies. *JAMA Pediatr*. Published online May 4, 2020. doi:10.1001/jamapediatrics.2020.0593

**eTable 1.** Rates of Early-Onset Sepsis per 1000 Live Births (LBs) by Study Center and Gestational Age

**eTable 2.** Group B *Streptococcus* Early-Onset Sepsis Rates per 1000 Live Births (LBs) by Study Center and Gestational Age

**eTable 3.** *Escherichia coli* Early-Onset Sepsis Rates per 1000 Live Births (LBs) by Study Center and Gestational Age

**eTable 4.** Rates of Early-Onset Sepsis per 1000 Live Births (LBs) by Study Center and Birth Weight

**eTable 5.** Group B *Streptococcus* Early-Onset Sepsis Rates per 1000 Live Births (LBs) by Study Center and Birth Weight

**eTable 6.** *Escherichia coli* Early-Onset Sepsis Rates per 1000 Live Births (LBs) by Study Center and Birth Weight

**eTable 7.** Rates of Early-Onset Sepsis per 1000 Live Births (LBs) by Study Center and Infant Sex

**eTable 8.** Group B *Streptococcus* Early-Onset Sepsis Rates per 1000 Live Births (LBs) by Study Center and Infant Sex

**eTable 9.** *Escherichia coli* Early-Onset Sepsis Rates per 1000 Live Births (LBs) by Study Center and Infant Sex

**eTable 10.** Rates of Early-Onset Sepsis per 1000 Live Births (LBs) by Study Center—Over All Reporting Sites and by Maternal Race

**eTable 11.** Group B *Streptococcus* Early-Onset Sepsis Rates per 1000 Live Births (LBs) by Study Center—Over All Reporting Sites and by Maternal Race

**eTable 12.** *Escherichia coli* Early-Onset Sepsis Rates per 1000 Live Births (LBs) by Study Center—Over All Reporting Sites and by Maternal Race

**eTable 13.** Rates of Early-Onset Sepsis per 1000 Live Births (LBs) by Study Center—Over All Reporting Sites and by Maternal Ethnicity

**eTable 14.** Group B *Streptococcus* Early-Onset Sepsis Rates per 1000 Live Births (LBs) by Study Center—Over All Reporting Sites and by Maternal Ethnicity

**eTable 15.** *Escherichia coli* Early-Onset Sepsis Rates per 1000 Live Births (LBs) by Study Center—Over All Reporting Sites and by Maternal Ethnicity

**eTable 16.** Mortality and Timing of Death for Infants With Early-Onset Sepsis

**eTable 17.** Mortality by Gestational Age and Birth Weight for Infants With Early Onset Infection

**eFigure.** How Frequently Do Infants With Early-Onset Sepsis Born to Mothers With Chorioamnionitis Appear Well at Birth

This supplementary material has been provided by the authors to give readers additional information about their work.

**eTable 1. Rates of Early-Onset Sepsis per 1000 Live Births (LBs) by Study Center and Gestational Age**

| Center | Rate/1000 LBs (95% CI), n/N <sup>1</sup> |                     |                    |                   |                    |
|--------|------------------------------------------|---------------------|--------------------|-------------------|--------------------|
|        | All                                      | GA 22-28 w          | GA 29-33 w         | GA 34-36 w        | GA 37+ w           |
| A      | 1.53 (0.79-2.67)                         | 28.74 (9.39-65.78)  | 11.05 (3.02-28.05) | 2.38 (0.29-8.57)  | 0.15 (0.00-0.86)   |
|        | 12/7853                                  | 5/174               | 4/362              | 2/840             | 1/6474             |
| B      | 1.48 (1.03-2.06)                         | 21.74 (5.95-54.72)  | 3.81 (0.46-13.69)  | 0 (0-2.14)        | 1.37 (0.91-1.96)   |
|        | 35/23664                                 | 4/184               | 2/525              | 0/1721            | 29/21234           |
| C      | 2.07 (0.95-3.93)                         | 57.97 (16.02-141.8) | 8.20 (0.21-44.82)  | 0 (0-10.57)       | 1.20 (0.33-3.07)   |
|        | 9/4347                                   | 4/69                | 1/122              | 0/347             | 4/3330             |
| D      | 2.02 (1.36-2.88)                         | 20.24 (6.60-46.61)  | 2.42 (0.06-13.38)  | 0.85 (0.02-4.72)  | 1.77 (1.12-2.65)   |
|        | 30/14848                                 | 5/247               | 1/414              | 1/1177            | 23/13010           |
| E      | 0.86 (0.46-1.48)                         | 19.34 (7.81-39.43)  | 4.69 (0.97-13.66)  | 0 (0-3.04)        | 0.23 (0.05-0.68)   |
|        | 13/15050                                 | 7/362               | 3/639              | 0/1210            | 3/12839            |
| F      | 1.25 (0.34-3.21)                         | 18.18 (0.46-97.19)  | 13.70 (1.66-48.61) | 0 (0-12.14)       | 0.37 (0.01-2.07)   |
|        | 4/3189                                   | 1/55                | 2/146              | 0/302             | 1/2686             |
| G      | 0.39 (0.16-0.81)                         | 10.93 (1.33-38.92)  | 4.25 (0.51-15.25)  | 0.78 (0.02-4.31)  | 0.13 (0.02-0.45)   |
|        | 7/17849                                  | 2/183               | 2/471              | 1/1290            | 2/15905            |
| H      | 0.56 (0.18-1.30)                         | 26.32 (5.46-74.98)  | 0 (0-14.25)        | 0 (0-5.05)        | 0.26 (0.03-0.92)   |
|        | 5/8939                                   | 3/114               | 0/257              | 0/729             | 2/7841             |
| I      | 0.94 (0.41-1.86)                         | 11.05 (3.02-28.05)  | 1.64 (0.04-9.13)   | 1.06 (0.03-5.89)  | 0.30 (0.04-1.10)   |
|        | 8/8488                                   | 4/362               | 1/608              | 1/943             | 2/6575             |
| J      | 1.54 (0.90-2.46)                         | 26.49 (11.50-51.53) | 6.31 (1.72-16.07)  | 0.66 (0.02-3.65)  | 0.46 (0.13-1.19)   |
|        | 17/11066                                 | 8/302               | 4/634              | 1/1524            | 4/8606             |
| K      | 0.67 (0.40-1.06)                         | 20.58 (9.91-37.51)  | 2.26 (0.27-8.14)   | 0 (0-1.61)        | 0.26 (0.10-0.57)   |
|        | 18/26730                                 | 10/486              | 2/885              | 0/2294            | 6/22929            |
| L      | 0.74 (0.36-1.36)                         | 0 (0-15.00)         | 5.03 (1.04-14.64)  | 0.76 (0.02-4.21)  | 0.53 (0.19-1.15)   |
|        | 10/13482                                 | 0/244               | 3/596              | 1/1321            | 6/11319            |
| M      | 1.22 (0.76-1.87)                         | 37.50 (13.88-79.83) | 14.81 (6.42-28.98) | 1.30 (0.16-4.69)  | 0.34 (0.11-0.78)   |
|        | 21/17143                                 | 6/160               | 8/540              | 2/1539            | 5/14904            |
| N      | 3.30 (1.96-5.21)                         | 16.39 (0.41-87.99)  | 21.37 (6.97-49.16) | 9.04 (2.94-20.97) | 1.52 (0.61-3.13)   |
|        | 18/5456                                  | 1/61                | 5/234              | 5/553             | 7/4608             |
| O      | 0.50 (0.23-0.95)                         | 16.30 (3.38-46.91)  | 6.79 (1.40-19.71)  | 0 (0-2.79)        | 0.19 (0.04-0.55)   |
|        | 9/17886                                  | 3/184               | 3/442              | 0/1318            | 3/15944            |
| P      | 0.79 (0.36-1.50)                         | 7.41 (0.90-26.50)   | 5.88 (1.60-14.99)  | 0 (0-3.56)        | 0.32 (0.07-0.93)   |
|        | 9/11385                                  | 2/270               | 4/680              | 0/1035            | 3/9401             |
| Q      | 6.25 (0.16-34.33)                        | 0 (0-308.5)         | 0 (0-102.8)        | 0 (0-67.23)       | 15.87 (0.40-85.30) |
|        | 1/160                                    | 0/10                | 0/34               | 0/53              | 1/63               |
| R      | 0.90 (0.41-1.72)                         | 12.42 (1.51-44.15)  | 10.71 (3.49-24.81) | 0 (0-3.69)        | 0.24 (0.03-0.87)   |
|        | 9/9945                                   | 2/161               | 5/467              | 0/999             | 2/8302             |

<sup>1</sup>Clopper-Pearson confidence intervals (CI) are shown. NICHD Neonatal Research Network Early-Onset Sepsis Surveillance Study II (2015-2017)

**eTable 2. Group B *Streptococcus* Early-Onset Sepsis Rates per 1000 Live Births (LBs) by Study Center and Gestational Age**

| Center | Rate/1000 LBs (95% CI), n/N <sup>1</sup> |                    |                   |                   |                    |
|--------|------------------------------------------|--------------------|-------------------|-------------------|--------------------|
|        | All                                      | GA 22-28 w         | GA 29-33 w        | GA 34-36 w        | GA 37+ w           |
| A      | 0.25 (0.03-0.92)                         | 5.75 (0.15-31.60)  | 2.76 (0.07-15.29) | 0 (0-4.38)        | 0 (0-0.57)         |
|        | 2/7853                                   | 1/174              | 1/362             | 0/840             | 0/6474             |
| B      | 0.76 (0.45-1.20)                         | 0 (0-19.85)        | 1.90 (0.05-10.57) | 0 (0-2.14)        | 0.80 (0.47-1.28)   |
|        | 18/23664                                 | 0/184              | 1/525             | 0/1721            | 17/21234           |
| C      | 0.69 (0.14-2.02)                         | 14.49 (0.37-78.12) | 0 (0-29.78)       | 0 (0-10.57)       | 0.60 (0.07-2.17)   |
|        | 3/4347                                   | 1/69               | 0/122             | 0/347             | 2/3330             |
| D      | 1.14 (0.67-1.83)                         | 8.10 (0.98-28.94)  | 0 (0-8.87)        | 0 (0-3.13)        | 1.15 (0.65-1.90)   |
|        | 17/14848                                 | 2/247              | 0/414             | 0/1177            | 15/13010           |
| E      | 0.20 (0.04-0.58)                         | 0 (0-10.14)        | 1.56 (0.04-8.69)  | 0 (0-3.04)        | 0.16 (0.02-0.56)   |
|        | 3/15050                                  | 0/362              | 1/639             | 0/1210            | 2/12839            |
| F      | 0 (0-1.16)                               | 0 (0-64.87)        | 0 (0-24.95)       | 0 (0-12.14)       | 0 (0-1.37)         |
|        | 0/3189                                   | 0/55               | 0/146             | 0/302             | 0/2686             |
| G      | 0.06 (0.00-0.31)                         | 0 (0-19.96)        | 0 (0-7.80)        | 0.78 (0.02-4.31)  | 0 (0-0.23)         |
|        | 1/17849                                  | 0/183              | 0/471             | 1/1290            | 0/15905            |
| H      | 0.22 (0.03-0.81)                         | 0 (0-31.84)        | 0 (0-14.25)       | 0 (0-5.05)        | 0.26 (0.03-0.92)   |
|        | 2/8939                                   | 0/114              | 0/257             | 0/729             | 2/7841             |
| I      | 0.24 (0.03-0.85)                         | 0 (0-10.14)        | 0 (0-6.05)        | 0 (0-3.90)        | 0.30 (0.04-1.10)   |
|        | 2/8488                                   | 0/362              | 0/608             | 0/943             | 2/6575             |
| J      | 0.18 (0.02-0.65)                         | 0 (0-12.14)        | 0 (0-5.80)        | 0 (0-2.42)        | 0.23 (0.03-0.84)   |
|        | 2/11066                                  | 0/302              | 0/634             | 0/1524            | 2/8606             |
| K      | 0.11 (0.02-0.33)                         | 0 (0-7.56)         | 0 (0-4.16)        | 0 (0-1.61)        | 0.13 (0.03-0.38)   |
|        | 3/26730                                  | 0/486              | 0/885             | 0/2294            | 3/22929            |
| L      | 0.15 (0.02-0.54)                         | 0 (0-15.00)        | 1.68 (0.04-9.31)  | 0.76 (0.02-4.21)  | 0 (0-0.33)         |
|        | 2/13482                                  | 0/244              | 1/596             | 1/1321            | 0/11319            |
| M      | 0.29 (0.09-0.68)                         | 0 (0-22.79)        | 5.56 (1.15-16.15) | 0 (0-2.39)        | 0.13 (0.02-0.48)   |
|        | 5/17143                                  | 0/160              | 3/540             | 0/1539            | 2/14904            |
| N      | 0.92 (0.30-2.14)                         | 0 (0-58.68)        | 8.55 (1.04-30.53) | 1.81 (0.05-10.03) | 0.43 (0.05-1.57)   |
|        | 5/5456                                   | 0/61               | 2/234             | 1/553             | 2/4608             |
| O      | 0.06 (0.00-0.31)                         | 0 (0-19.85)        | 0 (0-8.31)        | 0 (0-2.79)        | 0.06 (0.00-0.35)   |
|        | 1/17886                                  | 0/184              | 0/442             | 0/1318            | 1/15944            |
| P      | 0.26 (0.05-0.77)                         | 0 (0-13.57)        | 0 (0-5.41)        | 0 (0-3.56)        | 0.32 (0.07-0.93)   |
|        | 3/11385                                  | 0/270              | 0/680             | 0/1035            | 3/9401             |
| Q      | 6.25 (0.16-34.33)                        | 0 (0-308.5)        | 0 (0-102.8)       | 0 (0-67.23)       | 15.87 (0.40-85.30) |
|        | 1/160                                    | 0/10               | 0/34              | 0/53              | 1/63               |
| R      | 0.10 (0.00-0.56)                         | 6.21 (0.16-34.12)  | 0 (0-7.87)        | 0 (0-3.69)        | 0 (0-0.44)         |
|        | 1/9945                                   | 1/161              | 0/467             | 0/999             | 0/8302             |

<sup>1</sup>Clopper-Pearson confidence intervals (CI) are shown. NICHD Neonatal Research Network Early-Onset Sepsis Surveillance Study II (2015-2017)

**eTable 3. *Escherichia coli* Early-Onset Sepsis Rates per 1000 Live Births (LBs) by Study Center and Gestational Age**

| Center | Rate/1000 LBs (95% CI), n/N <sup>1</sup> |                    |                    |                  |                  |
|--------|------------------------------------------|--------------------|--------------------|------------------|------------------|
|        | All                                      | GA 22-28 w         | GA 29-33 w         | GA 34-36 w       | GA 37+ w         |
| A      | 0.64 (0.21-1.49)                         | 17.24 (3.57-49.56) | 2.76 (0.07-15.29)  | 1.19 (0.03-6.61) | 0 (0-0.57)       |
|        | 5/7853                                   | 3/174              | 1/362              | 1/840            | 0/6474           |
| B      | 0.42 (0.20-0.78)                         | 16.30 (3.38-46.91) | 1.90 (0.05-10.57)  | 0 (0-2.14)       | 0.28 (0.10-0.61) |
|        | 10/23664                                 | 3/184              | 1/525              | 0/1721           | 6/21234          |
| C      | 0.69 (0.14-2.02)                         | 43.48 (9.06-121.8) | 0 (0-29.78)        | 0 (0-10.57)      | 0 (0-1.11)       |
|        | 3/4347                                   | 3/69               | 0/122              | 0/347            | 0/3330           |
| D      | 0.34 (0.11-0.79)                         | 12.15 (2.51-35.08) | 2.42 (0.06-13.38)  | 0.85 (0.02-4.72) | 0 (0-0.28)       |
|        | 5/14848                                  | 3/247              | 1/414              | 1/1177           | 0/13010          |
| E      | 0.33 (0.11-0.78)                         | 8.29 (1.71-24.03)  | 1.56 (0.04-8.69)   | 0 (0-3.04)       | 0.08 (0.00-0.43) |
|        | 5/15050                                  | 3/362              | 1/639              | 0/1210           | 1/12839          |
| F      | 0.63 (0.08-2.26)                         | 0 (0-64.87)        | 13.70 (1.66-48.61) | 0 (0-12.14)      | 0 (0-1.37)       |
|        | 2/3189                                   | 0/55               | 2/146              | 0/302            | 0/2686           |
| G      | 0.17 (0.03-0.49)                         | 5.46 (0.14-30.07)  | 4.25 (0.51-15.25)  | 0 (0-2.86)       | 0 (0-0.23)       |
|        | 3/17849                                  | 1/183              | 2/471              | 0/1290           | 0/15905          |
| H      | 0.34 (0.07-0.98)                         | 26.32 (5.46-74.98) | 0 (0-14.25)        | 0 (0-5.05)       | 0 (0-0.47)       |
|        | 3/8939                                   | 3/114              | 0/257              | 0/729            | 0/7841           |
| I      | 0.59 (0.19-1.37)                         | 11.05 (3.02-28.05) | 0 (0-6.05)         | 1.06 (0.03-5.89) | 0 (0-0.56)       |
|        | 5/8488                                   | 4/362              | 0/608              | 1/943            | 0/6575           |
| J      | 1.08 (0.56-1.89)                         | 23.18 (9.37-47.17) | 3.15 (0.38-11.35)  | 0.66 (0.02-3.65) | 0.23 (0.03-0.84) |
|        | 12/11066                                 | 7/302              | 2/634              | 1/1524           | 2/8606           |
| K      | 0.22 (0.08-0.49)                         | 8.23 (2.25-20.94)  | 0 (0-4.16)         | 0 (0-1.61)       | 0.09 (0.01-0.32) |
|        | 6/26730                                  | 4/486              | 0/885              | 0/2294           | 2/22929          |
| L      | 0.22 (0.05-0.65)                         | 0 (0-15.00)        | 1.68 (0.04-9.31)   | 0 (0-2.79)       | 0.18 (0.02-0.64) |
|        | 3/13482                                  | 0/244              | 1/596              | 0/1321           | 2/11319          |
| M      | 0.41 (0.16-0.84)                         | 25.00 (6.85-62.77) | 3.70 (0.45-13.31)  | 0 (0-2.39)       | 0.07 (0.00-0.37) |
|        | 7/17143                                  | 4/160              | 2/540              | 0/1539           | 1/14904          |
| N      | 0.55 (0.11-1.61)                         | 16.39 (0.41-87.99) | 4.27 (0.11-23.58)  | 0 (0-6.65)       | 0.22 (0.01-1.21) |
|        | 3/5456                                   | 1/61               | 1/234              | 0/553            | 1/4608           |
| O      | 0.28 (0.09-0.65)                         | 10.87 (1.32-38.71) | 2.26 (0.06-12.54)  | 0 (0-2.79)       | 0.13 (0.02-0.45) |
|        | 5/17886                                  | 2/184              | 1/442              | 0/1318           | 2/15944          |
| P      | 0.35 (0.10-0.90)                         | 7.41 (0.90-26.50)  | 2.94 (0.36-10.58)  | 0 (0-3.56)       | 0 (0-0.39)       |
|        | 4/11385                                  | 2/270              | 2/680              | 0/1035           | 0/9401           |
| Q      | 0 (0-22.79)                              | 0 (0-308.5)        | 0 (0-102.8)        | 0 (0-67.23)      | 0 (0-56.87)      |
|        | 0/160                                    | 0/10               | 0/34               | 0/53             | 0/63             |
| R      | 0.50 (0.16-1.17)                         | 6.21 (0.16-34.12)  | 6.42 (1.33-18.66)  | 0 (0-3.69)       | 0.12 (0.00-0.67) |
|        | 5/9945                                   | 1/161              | 3/467              | 0/999            | 1/8302           |

<sup>1</sup>Clopper-Pearson confidence intervals (CI) are shown. NICHD Neonatal Research Network Early-Onset Sepsis Surveillance Study II (2015-2017)

**eTable 4. Rates of Early-Onset Sepsis per 1000 Live Births (LBs) by Study Center and Birth Weight**

| Center | Rate/1000 LBs (95% CI), n/N <sup>1</sup> |                     |                   |                    |
|--------|------------------------------------------|---------------------|-------------------|--------------------|
|        | All                                      | BW 401-1500 g       | BW 1501-2500 g    | BW 2501+ g         |
| A      | 1.53 (0.79-2.67)                         | 26.49 (11.50-51.53) | 2.99 (0.62-8.72)  | 0.15 (0.00-0.85)   |
|        | 12/7853                                  | 8/302               | 3/1003            | 1/6548             |
| B      | 1.48 (1.03-2.06)                         | 15.67 (5.11-36.20)  | 0.67 (0.02-3.71)  | 1.33 (0.89-1.91)   |
|        | 35/23664                                 | 5/319               | 1/1499            | 29/21846           |
| C      | 2.07 (0.95-3.93)                         | 27.21 (7.46-68.20)  | 2.09 (0.05-11.60) | 1.07 (0.29-2.75)   |
|        | 9/4347                                   | 4/147               | 1/478             | 4/3722             |
| D      | 2.02 (1.36-2.88)                         | 13.02 (4.24-30.12)  | 1.30 (0.16-4.68)  | 1.78 (1.13-2.67)   |
|        | 30/14848                                 | 5/384               | 2/1541            | 23/12923           |
| E      | 0.86 (0.46-1.48)                         | 15.49 (7.11-29.20)  | 1.32 (0.16-4.77)  | 0.15 (0.02-0.56)   |
|        | 13/15050                                 | 9/581               | 2/1513            | 2/12956            |
| F      | 1.25 (0.34-3.21)                         | 10.31 (0.26-56.10)  | 3.24 (0.08-17.90) | 0.72 (0.09-2.59)   |
|        | 4/3189                                   | 1/97                | 1/309             | 2/2783             |
| G      | 0.39 (0.16-0.81)                         | 8.22 (1.70-23.83)   | 1.48 (0.18-5.33)  | 0.12 (0.02-0.45)   |
|        | 7/17849                                  | 3/365               | 2/1352            | 2/16132            |
| H      | 0.56 (0.18-1.30)                         | 16.57 (3.43-47.67)  | 0 (0-4.99)        | 0.25 (0.03-0.90)   |
|        | 5/8939                                   | 3/181               | 0/737             | 2/8021             |
| I      | 0.94 (0.41-1.86)                         | 6.58 (1.80-16.76)   | 0.87 (0.02-4.85)  | 0.45 (0.09-1.30)   |
|        | 8/8488                                   | 4/608               | 1/1146            | 3/6734             |
| J      | 1.54 (0.90-2.46)                         | 16.23 (7.03-31.72)  | 2.71 (0.74-6.93)  | 0.55 (0.18-1.28)   |
|        | 17/11066                                 | 8/493               | 4/1475            | 5/9098             |
| K      | 0.67 (0.40-1.06)                         | 14.78 (7.66-25.67)  | 0 (0-1.52)        | 0.26 (0.09-0.56)   |
|        | 18/26730                                 | 12/812              | 0/2432            | 6/23486            |
| L      | 0.74 (0.36-1.36)                         | 2.37 (0.06-13.13)   | 2.33 (0.48-6.79)  | 0.51 (0.19-1.11)   |
|        | 10/13482                                 | 1/422               | 3/1288            | 6/11772            |
| M      | 1.22 (0.76-1.87)                         | 37.38 (19.46-64.39) | 2.81 (0.77-7.19)  | 0.32 (0.11-0.76)   |
|        | 21/17143                                 | 12/321              | 4/1422            | 5/15400            |
| N      | 3.30 (1.96-5.21)                         | 20.00 (4.14-57.33)  | 9.45 (3.48-20.45) | 1.93 (0.88-3.65)   |
|        | 18/5456                                  | 3/150               | 6/635             | 9/4671             |
| O      | 0.50 (0.23-0.95)                         | 8.36 (1.73-24.23)   | 2.03 (0.42-5.91)  | 0.19 (0.04-0.55)   |
|        | 9/17886                                  | 3/359               | 3/1480            | 3/16047            |
| P      | 0.79 (0.36-1.50)                         | 6.76 (1.40-19.62)   | 2.20 (0.45-6.42)  | 0.31 (0.06-0.92)   |
|        | 9/11385                                  | 3/444               | 3/1363            | 3/9578             |
| Q      | 6.25 (0.16-34.33)                        | 0 (0-161.1)         | 0 (0-59.63)       | 12.66 (0.32-68.52) |
|        | 1/160                                    | 0/21                | 0/60              | 1/79               |
| R      | 0.90 (0.41-1.72)                         | 12.66 (3.46-32.09)  | 2.97 (0.61-8.66)  | 0.23 (0.03-0.84)   |
|        | 9/9945                                   | 4/316               | 3/1010            | 2/8619             |

<sup>1</sup>Clopper-Pearson confidence intervals (CI) are shown. NICHD Neonatal Research Network Early-Onset Sepsis Surveillance Study II (2015-2017)

**eTable 5. Group B *Streptococcus* Early-Onset Sepsis Rates per 1000 Live Births (LBs) by Study Center and Birth Weight**

| Center | Rate/1000 LBs (95% CI), n/N <sup>1</sup> |                   |                  |                    |
|--------|------------------------------------------|-------------------|------------------|--------------------|
|        | All                                      | BW 401-1500 g     | BW 1501-2500 g   | BW 2501+ g         |
| A      | 0.25 (0.03-0.92)                         | 6.62 (0.80-23.72) | 0 (0-3.67)       | 0 (0-0.56)         |
|        | 2/7853                                   | 2/302             | 0/1003           | 0/6548             |
| B      | 0.76 (0.45-1.20)                         | 0 (0-11.50)       | 0.67 (0.02-3.71) | 0.78 (0.45-1.25)   |
|        | 18/23664                                 | 0/319             | 1/1499           | 17/21846           |
| C      | 0.69 (0.14-2.02)                         | 6.80 (0.17-37.32) | 0 (0-7.69)       | 0.54 (0.07-1.94)   |
|        | 3/4347                                   | 1/147             | 0/478            | 2/3722             |
| D      | 1.14 (0.67-1.83)                         | 5.21 (0.63-18.69) | 0 (0-2.39)       | 1.16 (0.65-1.91)   |
|        | 17/14848                                 | 2/384             | 0/1541           | 15/12923           |
| E      | 0.20 (0.04-0.58)                         | 1.72 (0.04-9.55)  | 0.66 (0.02-3.68) | 0.08 (0.00-0.43)   |
|        | 3/15050                                  | 1/581             | 1/1513           | 1/12956            |
| F      | 0 (0-1.16)                               | 0 (0-37.32)       | 0 (0-11.87)      | 0 (0-1.32)         |
|        | 0/3189                                   | 0/97              | 0/309            | 0/2783             |
| G      | 0.06 (0.00-0.31)                         | 0 (0-10.06)       | 0.74 (0.02-4.11) | 0 (0-0.23)         |
|        | 1/17849                                  | 0/365             | 1/1352           | 0/16132            |
| H      | 0.22 (0.03-0.81)                         | 0 (0-20.17)       | 0 (0-4.99)       | 0.25 (0.03-0.90)   |
|        | 2/8939                                   | 0/181             | 0/737            | 2/8021             |
| I      | 0.24 (0.03-0.85)                         | 0 (0-6.05)        | 0 (0-3.21)       | 0.30 (0.04-1.07)   |
|        | 2/8488                                   | 0/608             | 0/1146           | 2/6734             |
| J      | 0.18 (0.02-0.65)                         | 0 (0-7.45)        | 0 (0-2.50)       | 0.22 (0.03-0.79)   |
|        | 2/11066                                  | 0/493             | 0/1475           | 2/9098             |
| K      | 0.11 (0.02-0.33)                         | 0 (0-4.53)        | 0 (0-1.52)       | 0.13 (0.03-0.37)   |
|        | 3/26730                                  | 0/812             | 0/2432           | 3/23486            |
| L      | 0.15 (0.02-0.54)                         | 0 (0-8.70)        | 1.55 (0.19-5.60) | 0 (0-0.31)         |
|        | 2/13482                                  | 0/422             | 2/1288           | 0/11772            |
| M      | 0.29 (0.09-0.68)                         | 6.23 (0.76-22.32) | 0.70 (0.02-3.91) | 0.13 (0.02-0.47)   |
|        | 5/17143                                  | 2/321             | 1/1422           | 2/15400            |
| N      | 0.92 (0.30-2.14)                         | 6.67 (0.17-36.58) | 1.57 (0.04-8.74) | 0.64 (0.13-1.88)   |
|        | 5/5456                                   | 1/150             | 1/635            | 3/4671             |
| O      | 0.06 (0.00-0.31)                         | 0 (0-10.22)       | 0 (0-2.49)       | 0.06 (0.00-0.35)   |
|        | 1/17886                                  | 0/359             | 0/1480           | 1/16047            |
| P      | 0.26 (0.05-0.77)                         | 0 (0-8.27)        | 0 (0-2.70)       | 0.31 (0.06-0.92)   |
|        | 3/11385                                  | 0/444             | 0/1363           | 3/9578             |
| Q      | 6.25 (0.16-34.33)                        | 0 (0-161.1)       | 0 (0-59.63)      | 12.66 (0.32-68.52) |
|        | 1/160                                    | 0/21              | 0/60             | 1/79               |
| R      | 0.10 (0.00-0.56)                         | 3.16 (0.08-17.50) | 0 (0-3.65)       | 0 (0-0.43)         |
|        | 1/9945                                   | 1/316             | 0/1010           | 0/8619             |

<sup>1</sup>Clopper-Pearson confidence intervals (CI) are shown. NICHD Neonatal Research Network Early-Onset Sepsis Surveillance Study II (2015-2017)

**eTable 6. *Escherichia coli* Early-Onset Sepsis Rates per 1000 Live Births (LBs) by Study Center and Birth Weight**

| Center | Rate/1000 LBs (95% CI), n/N <sup>1</sup> |                    |                   |                  |
|--------|------------------------------------------|--------------------|-------------------|------------------|
|        | All                                      | BW 401-1500 g      | BW 1501-2500 g    | BW 2501+ g       |
| A      | 0.64 (0.21-1.49)                         | 13.25 (3.62-33.56) | 1.00 (0.03-5.54)  | 0 (0-0.56)       |
|        | 5/7853                                   | 4/302              | 1/1003            | 0/6548           |
| B      | 0.42 (0.20-0.78)                         | 12.54 (3.43-31.79) | 0 (0-2.46)        | 0.27 (0.10-0.60) |
|        | 10/23664                                 | 4/319              | 0/1499            | 6/21846          |
| C      | 0.69 (0.14-2.02)                         | 20.41 (4.23-58.48) | 0 (0-7.69)        | 0 (0-0.99)       |
|        | 3/4347                                   | 3/147              | 0/478             | 0/3722           |
| D      | 0.34 (0.11-0.79)                         | 7.81 (1.61-22.66)  | 1.30 (0.16-4.68)  | 0 (0-0.29)       |
|        | 5/14848                                  | 3/384              | 2/1541            | 0/12923          |
| E      | 0.33 (0.11-0.78)                         | 5.16 (1.07-15.02)  | 0.66 (0.02-3.68)  | 0.08 (0.00-0.43) |
|        | 5/15050                                  | 3/581              | 1/1513            | 1/12956          |
| F      | 0.63 (0.08-2.26)                         | 0 (0-37.32)        | 3.24 (0.08-17.90) | 0.36 (0.01-2.00) |
|        | 2/3189                                   | 0/97               | 1/309             | 1/2783           |
| G      | 0.17 (0.03-0.49)                         | 5.48 (0.66-19.65)  | 0.74 (0.02-4.11)  | 0 (0-0.23)       |
|        | 3/17849                                  | 2/365              | 1/1352            | 0/16132          |
| H      | 0.34 (0.07-0.98)                         | 16.57 (3.43-47.67) | 0 (0-4.99)        | 0 (0-0.46)       |
|        | 3/8939                                   | 3/181              | 0/737             | 0/8021           |
| I      | 0.59 (0.19-1.37)                         | 6.58 (1.80-16.76)  | 0 (0-3.21)        | 0.15 (0.00-0.83) |
|        | 5/8488                                   | 4/608              | 0/1146            | 1/6734           |
| J      | 1.08 (0.56-1.89)                         | 14.20 (5.73-29.04) | 1.36 (0.16-4.89)  | 0.33 (0.07-0.96) |
|        | 12/11066                                 | 7/493              | 2/1475            | 3/9098           |
| K      | 0.22 (0.08-0.49)                         | 4.93 (1.34-12.56)  | 0 (0-1.52)        | 0.09 (0.01-0.31) |
|        | 6/26730                                  | 4/812              | 0/2432            | 2/23486          |
| L      | 0.22 (0.05-0.65)                         | 2.37 (0.06-13.13)  | 0 (0-2.86)        | 0.17 (0.02-0.61) |
|        | 3/13482                                  | 1/422              | 0/1288            | 2/11772          |
| M      | 0.41 (0.16-0.84)                         | 15.58 (5.08-35.97) | 0.70 (0.02-3.91)  | 0.06 (0.00-0.36) |
|        | 7/17143                                  | 5/321              | 1/1422            | 1/15400          |
| N      | 0.55 (0.11-1.61)                         | 13.33 (1.62-47.33) | 0 (0-5.79)        | 0.21 (0.01-1.19) |
|        | 3/5456                                   | 2/150              | 0/635             | 1/4671           |
| O      | 0.28 (0.09-0.65)                         | 5.57 (0.68-19.98)  | 0.68 (0.02-3.76)  | 0.12 (0.02-0.45) |
|        | 5/17886                                  | 2/359              | 1/1480            | 2/16047          |
| P      | 0.35 (0.10-0.90)                         | 6.76 (1.40-19.62)  | 0.73 (0.02-4.08)  | 0 (0-0.39)       |
|        | 4/11385                                  | 3/444              | 1/1363            | 0/9578           |
| Q      | 0 (0-22.79)                              | 0 (0-161.1)        | 0 (0-59.63)       | 0 (0-45.62)      |
|        | 0/160                                    | 0/21               | 0/60              | 0/79             |
| R      | 0.50 (0.16-1.17)                         | 3.16 (0.08-17.50)  | 2.97 (0.61-8.66)  | 0.12 (0.00-0.65) |
|        | 5/9945                                   | 1/316              | 3/1010            | 1/8619           |

<sup>1</sup>Clopper-Pearson confidence intervals (CI) are shown. NICHD Neonatal Research Network Early-Onset Sepsis Surveillance Study II (2015-2017)

**eTable 7. Rates of Early-Onset Sepsis per 1000 Live Births (LBs) by Study Center and Infant Sex**

| Center | Rate/1000 LBs (95% CI), n/N <sup>1</sup> |                    |                  |
|--------|------------------------------------------|--------------------|------------------|
|        | All                                      | Male               | Female           |
| A      | 1.53 (0.79-2.67)                         | 1.75 (0.70-3.60)   | 1.30 (0.42-3.03) |
|        | 12/7853                                  | 7/4002             | 5/3851           |
| B      | 1.48 (1.03-2.06)                         | 1.00 (0.51-1.74)   | 1.98 (1.26-2.97) |
|        | 35/23664                                 | 12/12054           | 23/11610         |
| C      | 2.07 (0.95-3.93)                         | 3.67 (1.59-7.22)   | 0.46 (0.01-2.57) |
|        | 9/4347                                   | 8/2180             | 1/2167           |
| D      | 2.02 (1.36-2.88)                         | 2.24 (1.31-3.59)   | 1.79 (0.95-3.06) |
|        | 30/14848                                 | 17/7577            | 13/7271          |
| E      | 0.86 (0.46-1.48)                         | 0.77 (0.28-1.67)   | 0.97 (0.39-1.99) |
|        | 13/15050                                 | 6/7814             | 7/7233           |
| F      | 1.25 (0.34-3.21)                         | 2.36 (0.64-6.03)   | 0 (0-2.47)       |
|        | 4/3189                                   | 4/1695             | 0/1494           |
| G      | 0.39 (0.16-0.81)                         | 0.45 (0.12-1.14)   | 0.34 (0.07-0.99) |
|        | 7/17849                                  | 4/8963             | 3/8886           |
| H      | 0.56 (0.18-1.30)                         | 0.42 (0.05-1.52)   | 0.71 (0.15-2.08) |
|        | 5/8939                                   | 2/4735             | 3/4206           |
| I      | 0.94 (0.41-1.86)                         | 0.92 (0.25-2.34)   | 0.97 (0.26-2.49) |
|        | 8/8488                                   | 4/4370             | 4/4114           |
| J      | 1.54 (0.90-2.46)                         | 1.40 (0.60-2.75)   | 1.69 (0.77-3.20) |
|        | 17/11066                                 | 8/5719             | 9/5339           |
| K      | 0.67 (0.40-1.06)                         | 0.73 (0.35-1.34)   | 0.61 (0.27-1.21) |
|        | 18/26730                                 | 10/13701           | 8/13023          |
| L      | 0.74 (0.36-1.36)                         | 0.72 (0.23-1.69)   | 0.76 (0.25-1.77) |
|        | 10/13482                                 | 5/6911             | 5/6571           |
| M      | 1.22 (0.76-1.87)                         | 1.47 (0.78-2.52)   | 0.96 (0.42-1.89) |
|        | 21/17143                                 | 13/8822            | 8/8317           |
| N      | 3.30 (1.96-5.21)                         | 3.21 (1.47-6.09)   | 3.39 (1.55-6.43) |
|        | 18/5456                                  | 9/2803             | 9/2653           |
| O      | 0.50 (0.23-0.95)                         | 0.77 (0.31-1.59)   | 0.23 (0.03-0.82) |
|        | 9/17886                                  | 7/9083             | 2/8799           |
| P      | 0.79 (0.36-1.50)                         | 1.02 (0.37-2.21)   | 0.55 (0.11-1.60) |
|        | 9/11385                                  | 6/5895             | 3/5491           |
| Q      | 6.25 (0.16-34.33)                        | 12.20 (0.31-66.08) | 0 (0-46.19)      |
|        | 1/160                                    | 1/82               | 0/78             |
| R      | 0.90 (0.41-1.72)                         | 0.78 (0.21-1.99)   | 1.03 (0.33-2.39) |
|        | 9/9945                                   | 4/5137             | 5/4874           |

<sup>1</sup>Clopper-Pearson confidence intervals (CI) are shown. NICHD Neonatal Research Network Early-Onset Sepsis Surveillance Study II (2015-2017)



**eTable 8. Group B *Streptococcus* Early-Onset Sepsis Rates per 1000 Live Births (LBs) by Study Center and Infant Sex**

| Center | Rate/1000 LBs (95% CI), n/N <sup>1</sup> |                    |                  |
|--------|------------------------------------------|--------------------|------------------|
|        | All                                      | Male               | Female           |
| A      | 0.25 (0.03-0.92)                         | 0 (0-0.92)         | 0.52 (0.06-1.87) |
|        | 2/7853                                   | 0/4002             | 2/3851           |
| B      | 0.76 (0.45-1.20)                         | 0.50 (0.18-1.08)   | 1.03 (0.53-1.80) |
|        | 18/23664                                 | 6/12054            | 12/11610         |
| C      | 0.69 (0.14-2.02)                         | 1.38 (0.28-4.02)   | 0 (0-1.70)       |
|        | 3/4347                                   | 3/2180             | 0/2167           |
| D      | 1.14 (0.67-1.83)                         | 1.45 (0.72-2.60)   | 0.83 (0.30-1.80) |
|        | 17/14848                                 | 11/7577            | 6/7271           |
| E      | 0.20 (0.04-0.58)                         | 0.26 (0.03-0.92)   | 0.14 (0.00-0.77) |
|        | 3/15050                                  | 2/7814             | 1/7233           |
| F      | 0 (0-1.16)                               | 0 (0-2.17)         | 0 (0-2.47)       |
|        | 0/3189                                   | 0/1695             | 0/1494           |
| G      | 0.06 (0.00-0.31)                         | 0.11 (0.00-0.62)   | 0 (0-0.42)       |
|        | 1/17849                                  | 1/8963             | 0/8886           |
| H      | 0.22 (0.03-0.81)                         | 0.21 (0.01-1.18)   | 0.24 (0.01-1.32) |
|        | 2/8939                                   | 1/4735             | 1/4206           |
| I      | 0.24 (0.03-0.85)                         | 0.46 (0.06-1.65)   | 0 (0-0.90)       |
|        | 2/8488                                   | 2/4370             | 0/4114           |
| J      | 0.18 (0.02-0.65)                         | 0.17 (0.00-0.97)   | 0.19 (0.00-1.04) |
|        | 2/11066                                  | 1/5719             | 1/5339           |
| K      | 0.11 (0.02-0.33)                         | 0.07 (0.00-0.41)   | 0.15 (0.02-0.55) |
|        | 3/26730                                  | 1/13701            | 2/13023          |
| L      | 0.15 (0.02-0.54)                         | 0.14 (0.00-0.81)   | 0.15 (0.00-0.85) |
|        | 2/13482                                  | 1/6911             | 1/6571           |
| M      | 0.29 (0.09-0.68)                         | 0.34 (0.07-0.99)   | 0.24 (0.03-0.87) |
|        | 5/17143                                  | 3/8822             | 2/8317           |
| N      | 0.92 (0.30-2.14)                         | 1.07 (0.22-3.12)   | 0.75 (0.09-2.72) |
|        | 5/5456                                   | 3/2803             | 2/2653           |
| O      | 0.06 (0.00-0.31)                         | 0.11 (0.00-0.61)   | 0 (0-0.42)       |
|        | 1/17886                                  | 1/9083             | 0/8799           |
| P      | 0.26 (0.05-0.77)                         | 0.34 (0.04-1.23)   | 0.18 (0.00-1.01) |
|        | 3/11385                                  | 2/5895             | 1/5491           |
| Q      | 6.25 (0.16-34.33)                        | 12.20 (0.31-66.08) | 0 (0-46.19)      |
|        | 1/160                                    | 1/82               | 0/78             |
| R      | 0.10 (0.00-0.56)                         | 0 (0-0.72)         | 0.21 (0.01-1.14) |
|        | 1/9945                                   | 0/5137             | 1/4874           |

<sup>1</sup>Clopper-Pearson confidence intervals (CI) are shown. NICHD Neonatal Research Network Early-Onset Sepsis Surveillance Study II (2015-2017)

**eTable 9. *Escherichia coli* Early-Onset Sepsis Rates per 1000 Live Births (LBs) by Study Center and Infant Sex**

| Center | Rate/1000 LBs (95% CI), n/N <sup>1</sup> |                  |                  |
|--------|------------------------------------------|------------------|------------------|
|        | All                                      | Male             | Female           |
| A      | 0.64 (0.21-1.49)                         | 1.00 (0.27-2.56) | 0.26 (0.01-1.45) |
|        | 5/7853                                   | 4/4002           | 1/3851           |
| B      | 0.42 (0.20-0.78)                         | 0.17 (0.02-0.60) | 0.69 (0.30-1.36) |
|        | 10/23664                                 | 2/12054          | 8/11610          |
| C      | 0.69 (0.14-2.02)                         | 0.92 (0.11-3.31) | 0.46 (0.01-2.57) |
|        | 3/4347                                   | 2/2180           | 1/2167           |
| D      | 0.34 (0.11-0.79)                         | 0.26 (0.03-0.95) | 0.41 (0.09-1.21) |
|        | 5/14848                                  | 2/7577           | 3/7271           |
| E      | 0.33 (0.11-0.78)                         | 0.51 (0.14-1.31) | 0.14 (0.00-0.77) |
|        | 5/15050                                  | 4/7814           | 1/7233           |
| F      | 0.63 (0.08-2.26)                         | 1.18 (0.14-4.26) | 0 (0-2.47)       |
|        | 2/3189                                   | 2/1695           | 0/1494           |
| G      | 0.17 (0.03-0.49)                         | 0.22 (0.03-0.81) | 0.11 (0.00-0.63) |
|        | 3/17849                                  | 2/8963           | 1/8886           |
| H      | 0.34 (0.07-0.98)                         | 0.21 (0.01-1.18) | 0.48 (0.06-1.72) |
|        | 3/8939                                   | 1/4735           | 2/4206           |
| I      | 0.59 (0.19-1.37)                         | 0.46 (0.06-1.65) | 0.73 (0.15-2.13) |
|        | 5/8488                                   | 2/4370           | 3/4114           |
| J      | 1.08 (0.56-1.89)                         | 0.87 (0.28-2.04) | 1.31 (0.53-2.70) |
|        | 12/11066                                 | 5/5719           | 7/5339           |
| K      | 0.22 (0.08-0.49)                         | 0.36 (0.12-0.85) | 0.08 (0.00-0.43) |
|        | 6/26730                                  | 5/13701          | 1/13023          |
| L      | 0.22 (0.05-0.65)                         | 0.14 (0.00-0.81) | 0.30 (0.04-1.10) |
|        | 3/13482                                  | 1/6911           | 2/6571           |
| M      | 0.41 (0.16-0.84)                         | 0.57 (0.18-1.32) | 0.24 (0.03-0.87) |
|        | 7/17143                                  | 5/8822           | 2/8317           |
| N      | 0.55 (0.11-1.61)                         | 0.71 (0.09-2.58) | 0.38 (0.01-2.10) |
|        | 3/5456                                   | 2/2803           | 1/2653           |
| O      | 0.28 (0.09-0.65)                         | 0.44 (0.12-1.13) | 0.11 (0.00-0.63) |
|        | 5/17886                                  | 4/9083           | 1/8799           |
| P      | 0.35 (0.10-0.90)                         | 0.68 (0.18-1.74) | 0 (0-0.67)       |
|        | 4/11385                                  | 4/5895           | 0/5491           |
| Q      | 0 (0-22.79)                              | 0 (0-43.99)      | 0 (0-46.19)      |
|        | 0/160                                    | 0/82             | 0/78             |
| R      | 0.50 (0.16-1.17)                         | 0.58 (0.12-1.71) | 0.41 (0.05-1.48) |
|        | 5/9945                                   | 3/5137           | 2/4874           |

<sup>1</sup>Clopper-Pearson confidence intervals (CI) are shown. NICHD Neonatal Research Network Early-Onset Sepsis Surveillance Study II (2015-2017)

**eTable 10. Rates of Early-Onset Sepsis per 1000 Live Births (LBs) by Study Center—Over All Reporting Sites and by Maternal Race**

| Center <sup>1</sup> | Rate/1000 LBs (95% CI), n/N <sup>1</sup> |                  |                   |                                      |
|---------------------|------------------------------------------|------------------|-------------------|--------------------------------------|
|                     | All                                      | Black            | White             | Other race, unknown, or not reported |
| A                   | 1.53 (0.79-2.67)                         | 1.57 (0.68-3.10) | 2.52 (0.69-6.44)  | 0 (0-3.11)                           |
|                     | 12/7853                                  | 8/5080           | 4/1587            | 0/1186                               |
| C                   | 2.07 (0.95-3.93)                         | 1.74 (0.64-3.79) | 8.57 (1.77-24.84) | 0 (0-6.59)                           |
|                     | 9/4347                                   | 6/3439           | 3/350             | 0/558                                |
| D                   | 1.94 (1.13-3.10)                         | 1.20 (0.52-2.37) | 4.80 (1.93-9.86)  | 3.04 (0.37-10.94)                    |
|                     | 17/8776                                  | 8/6659           | 7/1459            | 2/658                                |
| E                   | 0.86 (0.46-1.48)                         | 1.34 (0.49-2.90) | 0.79 (0.32-1.63)  | 0 (0-2.14)                           |
|                     | 13/15050                                 | 6/4494           | 7/8836            | 0/1720                               |
| F                   | 1.25 (0.34-3.21)                         | 2.15 (0.26-7.76) | 0.49 (0.01-2.74)  | 4.42 (0.11-24.41)                    |
|                     | 4/3189                                   | 2/929            | 1/2034            | 1/226                                |
| H                   | 0.56 (0.18-1.30)                         | 0 (0-18.37)      | 0.66 (0.18-1.69)  | 0.37 (0.01-2.07)                     |
|                     | 5/8939                                   | 0/199            | 4/6057            | 1/2685                               |
| I                   | 0.94 (0.41-1.86)                         | 0.97 (0.26-2.48) | 0.97 (0.26-2.49)  | 0 (0-14.65)                          |
|                     | 8/8488                                   | 4/4121           | 4/4117            | 0/250                                |
| L                   | 0.74 (0.36-1.36)                         | 1.42 (0.17-5.13) | 0.75 (0.32-1.48)  | 0 (0-2.63)                           |
|                     | 10/13482                                 | 2/1405           | 8/10677           | 0/1401                               |
| M                   | 1.08 (0.59-1.81)                         | 0 (0-24.95)      | 0.73 (0.31-1.43)  | 3.31 (1.22-7.20)                     |
|                     | 14/12944                                 | 0/146            | 8/10988           | 6/1810                               |
| N                   | 3.30 (1.96-5.21)                         | 0 (0-25.47)      | 3.04 (1.52-5.43)  | 5.20 (2.09-10.68)                    |
|                     | 18/5456                                  | 0/143            | 11/3620           | 7/1347                               |
| O                   | 0.50 (0.23-0.95)                         | 0.37 (0.08-1.07) | 0.87 (0.32-1.89)  | 0 (0-1.32)                           |
|                     | 9/17886                                  | 3/8199           | 6/6889            | 0/2798                               |
| P                   | 0.79 (0.36-1.50)                         | 1.49 (0.48-3.46) | 0.47 (0.10-1.37)  | 0.62 (0.02-3.45)                     |
|                     | 9/11385                                  | 5/3365           | 3/6409            | 1/1611                               |
| R                   | 0.90 (0.41-1.72)                         | 1.45 (0.30-4.23) | 0.65 (0.18-1.67)  | 1.09 (0.13-3.92)                     |
|                     | 9/9945                                   | 3/2071           | 4/6117            | 2/1839                               |

<sup>1</sup>Data were excluded from calculations if number of births was not reported by race (1 center) or if the number of births recorded as 'other race/unknown/not reported' was >20% of the total live births reported (4 centers, 1 hospital at each of 2 additional centers) UNLESS >20% of infants at the center were thought to have maternal race other than white or black as determined by center infants born 2015-2017 enrolled in the NRN high risk infant registry (centers H and N).

<sup>2</sup>Clopper-Pearson confidence intervals (CI) are shown.

NICHD Neonatal Research Network Early-Onset Sepsis Surveillance Study II (2015-2017)

**eTable 11. Group B *Streptococcus* Early-Onset Sepsis Rates per 1000 Live Births (LBs) by Study Center—Over All Reporting Sites and by Maternal Race**

| Center <sup>1</sup> | Rate/1000 LBs (95% CI), n/N <sup>2</sup> |                  |                   |                                      |
|---------------------|------------------------------------------|------------------|-------------------|--------------------------------------|
|                     | All                                      | Black            | White             | Other race, unknown, or not reported |
| A                   | 0.25 (0.03-0.92)                         | 0.20 (0.00-1.10) | 0.63 (0.02-3.51)  | 0 (0-3.11)                           |
|                     | 2/7853                                   | 1/5080           | 1/1587            | 0/1186                               |
| C                   | 0.69 (0.14-2.02)                         | 0 (0-1.07)       | 8.57 (1.77-24.84) | 0 (0-6.59)                           |
|                     | 3/4347                                   | 0/3439           | 3/350             | 0/558                                |
| D                   | 1.03 (0.47-1.95)                         | 0.75 (0.24-1.75) | 2.06 (0.42-6.00)  | 1.52 (0.04-8.44)                     |
|                     | 9/8776                                   | 5/6659           | 3/1459            | 1/658                                |
| E                   | 0.20 (0.04-0.58)                         | 0 (0-0.82)       | 0.34 (0.07-0.99)  | 0 (0-2.14)                           |
|                     | 3/15050                                  | 0/4494           | 3/8836            | 0/1720                               |
| F                   | 0 (0-1.16)                               | 0 (0-3.96)       | 0 (0-1.81)        | 0 (0-16.19)                          |
|                     | 0/3189                                   | 0/929            | 0/2034            | 0/226                                |
| H                   | 0.22 (0.03-0.81)                         | 0 (0-18.37)      | 0.17 (0.00-0.92)  | 0.37 (0.01-2.07)                     |
|                     | 2/8939                                   | 0/199            | 1/6057            | 1/2685                               |
| I                   | 0.24 (0.03-0.85)                         | 0.49 (0.06-1.75) | 0 (0-0.90)        | 0 (0-14.65)                          |
|                     | 2/8488                                   | 2/4121           | 0/4117            | 0/250                                |
| L                   | 0.15 (0.02-0.54)                         | 0 (0-2.62)       | 0.19 (0.02-0.68)  | 0 (0-2.63)                           |
|                     | 2/13482                                  | 0/1405           | 2/10677           | 0/1401                               |
| M                   | 0.31 (0.08-0.79)                         | 0 (0-24.95)      | 0.27 (0.06-0.80)  | 0.55 (0.01-3.07)                     |
|                     | 4/12944                                  | 0/146            | 3/10988           | 1/1810                               |
| N                   | 0.92 (0.30-2.14)                         | 0 (0-25.47)      | 0.83 (0.17-2.42)  | 1.48 (0.18-5.35)                     |
|                     | 5/5456                                   | 0/143            | 3/3620            | 2/1347                               |
| O                   | 0.06 (0.00-0.31)                         | 0.12 (0.00-0.68) | 0 (0-0.54)        | 0 (0-1.32)                           |
|                     | 1/17886                                  | 1/8199           | 0/6889            | 0/2798                               |
| P                   | 0.26 (0.05-0.77)                         | 0.59 (0.07-2.15) | 0.16 (0.00-0.87)  | 0 (0-2.29)                           |
|                     | 3/11385                                  | 2/3365           | 1/6409            | 0/1611                               |
| R                   | 0.10 (0.00-0.56)                         | 0.48 (0.01-2.69) | 0 (0-0.60)        | 0 (0-2.00)                           |
|                     | 1/9945                                   | 1/2071           | 0/6117            | 0/1839                               |

<sup>1</sup>Data were excluded from calculations if number of births was not reported by race (1 center) or if the number of births recorded as 'other race/unknown/not reported' was >20% of the total live births reported (4 centers, 1 hospital at each of 2 additional centers) UNLESS >20% of infants at the center were thought to have maternal race other than white or black as determined by center infants born 2015-2017 enrolled in the NRN high risk infant registry (centers H and N).

<sup>2</sup>Clopper-Pearson confidence intervals (CI) are shown.

NICHD Neonatal Research Network Early-Onset Sepsis Surveillance Study II (2015-2017)

**eTable 12. *Escherichia coli* Early-Onset Sepsis Rates per 1000 Live Births (LBs) by Study Center—Over All Reporting Sites and by Maternal Race**

| Center <sup>1</sup> | Rate/1000 LBs (95% CI), n/N <sup>1</sup> |                  |                  |                                      |
|---------------------|------------------------------------------|------------------|------------------|--------------------------------------|
|                     | All                                      | Black            | White            | Other race, unknown, or not reported |
| A                   | 0.64 (0.21-1.49)                         | 0.79 (0.21-2.01) | 0.63 (0.02-3.51) | 0 (0-3.11)                           |
|                     | 5/7853                                   | 4/5080           | 1/1587           | 0/1186                               |
| C                   | 0.69 (0.14-2.02)                         | 0.87 (0.18-2.55) | 0 (0-10.48)      | 0 (0-6.59)                           |
|                     | 3/4347                                   | 3/3439           | 0/350            | 0/558                                |
| D                   | 0.57 (0.19-1.33)                         | 0.30 (0.04-1.08) | 1.37 (0.17-4.94) | 1.52 (0.04-8.44)                     |
|                     | 5/8776                                   | 2/6659           | 2/1459           | 1/658                                |
| E                   | 0.33 (0.11-0.78)                         | 0.67 (0.14-1.95) | 0.23 (0.03-0.82) | 0 (0-2.14)                           |
|                     | 5/15050                                  | 3/4494           | 2/8836           | 0/1720                               |
| F                   | 0.63 (0.08-2.26)                         | 1.08 (0.03-5.98) | 0.49 (0.01-2.74) | 0 (0-16.19)                          |
|                     | 2/3189                                   | 1/929            | 1/2034           | 0/226                                |
| H                   | 0.34 (0.07-0.98)                         | 0 (0-18.37)      | 0.50 (0.10-1.45) | 0 (0-1.37)                           |
|                     | 3/8939                                   | 0/199            | 3/6057           | 0/2685                               |
| I                   | 0.59 (0.19-1.37)                         | 0.49 (0.06-1.75) | 0.73 (0.15-2.13) | 0 (0-14.65)                          |
|                     | 5/8488                                   | 2/4121           | 3/4117           | 0/250                                |
| L                   | 0.22 (0.05-0.65)                         | 0 (0-2.62)       | 0.28 (0.06-0.82) | 0 (0-2.63)                           |
|                     | 3/13482                                  | 0/1405           | 3/10677          | 0/1401                               |
| M                   | 0.31 (0.08-0.79)                         | 0 (0-24.95)      | 0.09 (0.00-0.51) | 1.66 (0.34-4.84)                     |
|                     | 4/12944                                  | 0/146            | 1/10988          | 3/1810                               |
| N                   | 0.55 (0.11-1.61)                         | 0 (0-25.47)      | 0.28 (0.01-1.54) | 1.48 (0.18-5.35)                     |
|                     | 3/5456                                   | 0/143            | 1/3620           | 2/1347                               |
| O                   | 0.28 (0.09-0.65)                         | 0.12 (0.00-0.68) | 0.58 (0.16-1.49) | 0 (0-1.32)                           |
|                     | 5/17886                                  | 1/8199           | 4/6889           | 0/2798                               |
| P                   | 0.35 (0.10-0.90)                         | 0.59 (0.07-2.15) | 0.31 (0.04-1.13) | 0 (0-2.29)                           |
|                     | 4/11385                                  | 2/3365           | 2/6409           | 0/1611                               |
| R                   | 0.50 (0.16-1.17)                         | 0.48 (0.01-2.69) | 0.49 (0.10-1.43) | 0.54 (0.01-3.03)                     |
|                     | 5/9945                                   | 1/2071           | 3/6117           | 1/1839                               |

<sup>1</sup>Data were excluded from calculations if number of births was not reported by race (1 center) or if the number of births recorded as 'other race/unknown/not reported' was >20% of the total live births reported (4 centers, 1 hospital at each of 2 additional centers) UNLESS >20% of infants at the center were thought to have maternal race other than white or black as determined by center infants born 2015-2017 enrolled in the NRN high risk infant registry (centers H and N).

<sup>2</sup>Clopper-Pearson confidence intervals (CI) are shown.

NICHD Neonatal Research Network Early-Onset Sepsis Surveillance Study II (2015-2017)

**eTable 13. Rates of Early-Onset Sepsis per 1000 Live Births (LBs) by Study Center—Over All Reporting Sites and by Maternal Ethnicity**

| Center <sup>1</sup> | Rate/1000 LBs (95% CI), n/N <sup>1</sup> |                   |                   |                         |
|---------------------|------------------------------------------|-------------------|-------------------|-------------------------|
|                     | All                                      | Hispanic          | Non-Hispanic      | Unknown or not reported |
| B                   | 1.48 (1.03-2.06)                         | 1.01 (0.61-1.58)  | 3.24 (1.85-5.25)  | 0                       |
|                     | 35/23664                                 | 19/18720          | 16/4944           | 0/0                     |
| C                   | 2.07 (0.95-3.93)                         | 0 (0-49.28)       | 2.12 (0.97-4.02)  | 0 (0-123.4)             |
|                     | 9/4347                                   | 0/73              | 9/4246            | 0/28                    |
| D                   | 2.14 (1.14-3.66)                         | 1.49 (0.18-5.37)  | 2.33 (1.17-4.17)  | 0 (0-218.0)             |
|                     | 13/6072                                  | 2/1344            | 11/4713           | 0/15                    |
| E                   | 0.86 (0.46-1.48)                         | 0.80 (0.02-4.42)  | 0.97 (0.50-1.69)  | 0 (0-2.70)              |
|                     | 13/15050                                 | 1/1257            | 12/12429          | 0/1364                  |
| F                   | 1.25 (0.34-3.21)                         | 0 (0-6.83)        | 1.51 (0.41-3.86)  | 0 (0-602.4)             |
|                     | 4/3189                                   | 0/538             | 4/2647            | 0/4                     |
| H                   | 0.56 (0.18-1.30)                         | 1.22 (0.33-3.12)  | 0.18 (0.00-0.98)  | 0                       |
|                     | 5/8939                                   | 4/3275            | 1/5666            | 0/0                     |
| I                   | 0.94 (0.41-1.86)                         | 0 (0-2.75)        | 1.12 (0.48-2.20)  | 0                       |
|                     | 8/8488                                   | 0/1341            | 8/7147            | 0/0                     |
| J                   | 2.56 (0.31-9.22)                         | 5.28 (0.64-18.93) | 0 (0-9.13)        | 0                       |
|                     | 2/781                                    | 2/379             | 0/402             | 0/0                     |
| K                   | 1.21 (0.71-1.94)                         | 0.34 (0.01-1.87)  | 1.53 (0.88-2.49)  | 0 (0-5.78)              |
|                     | 17/14043                                 | 1/2979            | 16/10428          | 0/636                   |
| L                   | 0.74 (0.36-1.36)                         | 0 (0-2.69)        | 0.83 (0.40-1.53)  | 0 (0-36.94)             |
|                     | 10/13482                                 | 0/1372            | 10/12013          | 0/98                    |
| M                   | 1.08 (0.59-1.81)                         | 2.04 (0.56-5.22)  | 0.96 (0.46-1.76)  | 0 (0-7.02)              |
|                     | 14/12944                                 | 4/1960            | 10/10460          | 0/524                   |
| N                   | 3.30 (1.96-5.21)                         | 2.51 (1.08-4.94)  | 4.82 (2.21-9.13)  | 2.49 (0.06-13.78)       |
|                     | 18/5456                                  | 8/3186            | 9/1868            | 1/402                   |
| O                   | 0.50 (0.23-0.95)                         | 2.39 (0.49-6.98)  | 0.39 (0.14-0.85)  | 0 (0-2.88)              |
|                     | 9/17886                                  | 3/1254            | 6/15352           | 0/1280                  |
| P                   | 0.79 (0.36-1.50)                         | 1.54 (0.19-5.57)  | 0.69 (0.28-1.43)  | 0                       |
|                     | 9/11385                                  | 2/1295            | 7/10091           | 0/0                     |
| Q                   | 6.25 (0.16-34.33)                        | 0 (0-119.4)       | 7.81 (0.20-42.76) | 0 (0-707.6)             |
|                     | 1/160                                    | 0/29              | 1/128             | 0/3                     |
| R                   | 0.90 (0.41-1.72)                         | 0 (0-4.62)        | 0.54 (0.18-1.27)  | 102.6 (28.66-242.2)     |
|                     | 9/9945                                   | 0/796             | 5/9191            | 4/39                    |

<sup>1</sup>Data were excluded from calculations if number of births was not reported by ethnicity (2 centers, 1 hospital at each of 2 additional centers) or if the number of births recorded as 'unknown/not reported' was >20% of the total live births reported (1 hospital at each of 2 centers).

<sup>2</sup>Clopper-Pearson confidence intervals (CI) are shown.

NICHD Neonatal Research Network Early-Onset Sepsis Surveillance Study II (2015-2017)

**eTable 14. Group B *Streptococcus* Early-Onset Sepsis Rates per 1000 Live Births (LBs) by Study Center—Over All Reporting Sites and by Maternal Ethnicity**

| Center <sup>1</sup> | Rate/1000 LBs (95% CI), n/N <sup>2</sup> |                  |                   |                         |
|---------------------|------------------------------------------|------------------|-------------------|-------------------------|
|                     | All                                      | Hispanic         | Non-Hispanic      | Unknown or not reported |
| B                   | 0.76 (0.45-1.20)                         | 0.32 (0.12-0.70) | 2.43 (1.25-4.24)  | 0                       |
|                     | 18/23664                                 | 6/18720          | 12/4944           | 0/0                     |
| C                   | 0.69 (0.14-2.02)                         | 0 (0-49.28)      | 0.71 (0.15-2.06)  | 0 (0-123.4)             |
|                     | 3/4347                                   | 0/73             | 3/4246            | 0/28                    |
| D                   | 1.32 (0.57-2.59)                         | 0.74 (0.02-4.14) | 1.49 (0.60-3.06)  | 0 (0-218.0)             |
|                     | 8/6072                                   | 1/1344           | 7/4713            | 0/15                    |
| E                   | 0.20 (0.04-0.58)                         | 0 (0-2.93)       | 0.24 (0.05-0.71)  | 0 (0-2.70)              |
|                     | 3/15050                                  | 0/1257           | 3/12429           | 0/1364                  |
| F                   | 0 (0-1.16)                               | 0 (0-6.83)       | 0 (0-1.39)        | 0 (0-602.4)             |
|                     | 0/3189                                   | 0/538            | 0/2647            | 0/4                     |
| H                   | 0.22 (0.03-0.81)                         | 0.31 (0.01-1.70) | 0.18 (0.00-0.98)  | 0                       |
|                     | 2/8939                                   | 1/3275           | 1/5666            | 0/0                     |
| I                   | 0.24 (0.03-0.85)                         | 0 (0-2.75)       | 0.28 (0.03-1.01)  | 0                       |
|                     | 2/8488                                   | 0/1341           | 2/7147            | 0/0                     |
| J                   | 0 (0-4.71)                               | 0 (0-9.69)       | 0 (0-9.13)        | 0                       |
|                     | 0/781                                    | 0/379            | 0/402             | 0/0                     |
| K                   | 0.21 (0.04-0.62)                         | 0.34 (0.01-1.87) | 0.19 (0.02-0.69)  | 0 (0-5.78)              |
|                     | 3/14043                                  | 1/2979           | 2/10428           | 0/636                   |
| L                   | 0.15 (0.02-0.54)                         | 0 (0-2.69)       | 0.17 (0.02-0.60)  | 0 (0-36.94)             |
|                     | 2/13482                                  | 0/1372           | 2/12013           | 0/98                    |
| M                   | 0.31 (0.08-0.79)                         | 1.02 (0.12-3.68) | 0.19 (0.02-0.69)  | 0 (0-7.02)              |
|                     | 4/12944                                  | 2/1960           | 2/10460           | 0/524                   |
| N                   | 0.92 (0.30-2.14)                         | 0.63 (0.08-2.27) | 1.61 (0.33-4.69)  | 0 (0-9.13)              |
|                     | 5/5456                                   | 2/3186           | 3/1868            | 0/402                   |
| O                   | 0.06 (0.00-0.31)                         | 0.80 (0.02-4.44) | 0 (0-0.24)        | 0 (0-2.88)              |
|                     | 1/17886                                  | 1/1254           | 0/15352           | 0/1280                  |
| P                   | 0.26 (0.05-0.77)                         | 0.77 (0.02-4.29) | 0.20 (0.02-0.72)  | 0                       |
|                     | 3/11385                                  | 1/1295           | 2/10091           | 0/0                     |
| Q                   | 6.25 (0.16-34.33)                        | 0 (0-119.4)      | 7.81 (0.20-42.76) | 0 (0-707.6)             |
|                     | 1/160                                    | 0/29             | 1/128             | 0/3                     |
| R                   | 0.10 (0.00-0.56)                         | 0 (0-4.62)       | 0 (0-0.40)        | 25.64 (0.65-134.8)      |
|                     | 1/9945                                   | 0/796            | 0/9191            | 1/39                    |

<sup>1</sup>Data were excluded from calculations if number of births was not reported by ethnicity (2 centers, 1 hospital at each of 2 additional centers) or if the number of births recorded as 'unknown/not reported' was >20% of the total live births reported (1 hospital at each of 2 centers).

<sup>2</sup>Clopper-Pearson confidence intervals (CI) are shown.

NICHD Neonatal Research Network Early-Onset Sepsis Surveillance Study II (2015-2017)

**eTable 15. *Escherichia coli* Early-Onset Sepsis Rates per 1000 Live Births (LBs) by Study Center—Over All Reporting Sites and by Maternal Ethnicity**

| Center <sup>1</sup> | Rate/1000 LBs (95% CI), n/N <sup>1</sup> |                   |                  |                         |
|---------------------|------------------------------------------|-------------------|------------------|-------------------------|
|                     | All                                      | Hispanic          | Non-Hispanic     | Unknown or not reported |
| B                   | 0.42 (0.20-0.78)                         | 0.37 (0.15-0.77)  | 0.61 (0.13-1.77) | 0                       |
|                     | 10/23664                                 | 7/18720           | 3/4944           | 0/0                     |
| C                   | 0.69 (0.14-2.02)                         | 0 (0-49.28)       | 0.71 (0.15-2.06) | 0 (0-123.4)             |
|                     | 3/4347                                   | 0/73              | 3/4246           | 0/28                    |
| D                   | 0 (0-0.61)                               | 0 (0-2.74)        | 0 (0-0.78)       | 0 (0-218.0)             |
|                     | 0/6072                                   | 0/1344            | 0/4713           | 0/15                    |
| E                   | 0.33 (0.11-0.78)                         | 0.80 (0.02-4.42)  | 0.32 (0.09-0.82) | 0 (0-2.70)              |
|                     | 5/15050                                  | 1/1257            | 4/12429          | 0/1364                  |
| F                   | 0.63 (0.08-2.26)                         | 0 (0-6.83)        | 0.76 (0.09-2.73) | 0 (0-602.4)             |
|                     | 2/3189                                   | 0/538             | 2/2647           | 0/4                     |
| H                   | 0.34 (0.07-0.98)                         | 0.92 (0.19-2.67)  | 0 (0-0.65)       | 0                       |
|                     | 3/8939                                   | 3/3275            | 0/5666           | 0/0                     |
| I                   | 0.59 (0.19-1.37)                         | 0 (0-2.75)        | 0.70 (0.23-1.63) | 0                       |
|                     | 5/8488                                   | 0/1341            | 5/7147           | 0/0                     |
| J                   | 2.56 (0.31-9.22)                         | 5.28 (0.64-18.93) | 0 (0-9.13)       | 0                       |
|                     | 2/781                                    | 2/379             | 0/402            | 0/0                     |
| K                   | 0.36 (0.12-0.83)                         | 0 (0-1.24)        | 0.48 (0.16-1.12) | 0 (0-5.78)              |
|                     | 5/14043                                  | 0/2979            | 5/10428          | 0/636                   |
| L                   | 0.22 (0.05-0.65)                         | 0 (0-2.69)        | 0.25 (0.05-0.73) | 0 (0-36.94)             |
|                     | 3/13482                                  | 0/1372            | 3/12013          | 0/98                    |
| M                   | 0.31 (0.08-0.79)                         | 0.51 (0.01-2.84)  | 0.29 (0.06-0.84) | 0 (0-7.02)              |
|                     | 4/12944                                  | 1/1960            | 3/10460          | 0/524                   |
| N                   | 0.55 (0.11-1.61)                         | 0.31 (0.01-1.75)  | 1.07 (0.13-3.86) | 0 (0-9.13)              |
|                     | 3/5456                                   | 1/3186            | 2/1868           | 0/402                   |
| O                   | 0.28 (0.09-0.65)                         | 0.80 (0.02-4.44)  | 0.26 (0.07-0.67) | 0 (0-2.88)              |
|                     | 5/17886                                  | 1/1254            | 4/15352          | 0/1280                  |
| P                   | 0.35 (0.10-0.90)                         | 0 (0-2.84)        | 0.40 (0.11-1.01) | 0                       |
|                     | 4/11385                                  | 0/1295            | 4/10091          | 0/0                     |
| Q                   | 0 (0-22.79)                              | 0 (0-119.4)       | 0 (0-28.41)      | 0 (0-707.6)             |
|                     | 0/160                                    | 0/29              | 0/128            | 0/3                     |
| R                   | 0.50 (0.16-1.17)                         | 0 (0-4.62)        | 0.33 (0.07-0.95) | 51.28 (6.27-173.2)      |
|                     | 5/9945                                   | 0/796             | 3/9191           | 2/39                    |

<sup>1</sup>Data were excluded from calculations if number of births was not reported by ethnicity (2 centers, 1 hospital at each of 2 additional centers) or if the number of births recorded as 'unknown/not reported' was >20% of the total live births reported (1 hospital at each of 2 centers).

<sup>2</sup>Clopper-Pearson confidence intervals (CI) are shown.

NICHD Neonatal Research Network Early-Onset Sepsis Surveillance Study II (2015-2017)



**eTable 16. Mortality and Timing of Death for Infants With Early-Onset Sepsis**

|                                     |  | All<br>(N=235) | Preterm (22-36 wk)<br>with GBS or <i>E.coli</i> |                         | Term (37+ wk)<br>with GBS or <i>E.coli</i> |                         | All with GBS or <i>E.coli</i> |                         |                                                                           |
|-------------------------------------|--|----------------|-------------------------------------------------|-------------------------|--------------------------------------------|-------------------------|-------------------------------|-------------------------|---------------------------------------------------------------------------|
|                                     |  |                | GBS<br>(N=17)                                   | <i>E.coli</i><br>(N=68) | GBS<br>(N=53)                              | <i>E.coli</i><br>(N=17) | GBS<br>(N=70)                 | <i>E.coli</i><br>(N=85) | Adjusted RR of death<br>for <i>E.coli</i> vs GBS<br>(95% CI) <sup>1</sup> |
| All deaths, n (%)                   |  | 38 (16)        | 4 (24)                                          | 27 (40)                 | 0 (0)                                      | 0 (0)                   | 4 (6)                         | 27 (32)                 | 1.66 (0.66-4.16)                                                          |
| Timing of death, n (%) <sup>2</sup> |  |                |                                                 |                         |                                            |                         |                               |                         |                                                                           |
| 1-3 d                               |  | 19 (50)        | 2 (50)                                          | 16 (59)                 | 0 (0)                                      | 0 (0)                   | 2 (50)                        | 16 (59)                 |                                                                           |
| 4-7 d                               |  | 6 (16)         | 1 (25)                                          | 4 (15)                  | 0 (0)                                      | 0 (0)                   | 1 (25)                        | 4 (15)                  |                                                                           |
| 8-14 d                              |  | 5 (13)         | 1 (25)                                          | 1 (4)                   | 0 (0)                                      | 0 (0)                   | 1 (25)                        | 1 (4)                   |                                                                           |
| 15+ d                               |  | 8 (21)         | 0 (0)                                           | 6 (22)                  | 0 (0)                                      | 0 (0)                   | 0 (0)                         | 6 (22)                  |                                                                           |

Data for one infant with both GBS and *E.coli* were included in all patient data but excluded from GBS and *E.coli* columns.

<sup>1</sup> Relative risk (RR) of death and 95% confidence interval (CI) for infants with *E.coli* versus GBS infection adjusted for gestational age from a modified Poisson regression model that included gestational age (continuous) and pathogen group indicator. The adjusted RR was not statistically significant, p=0.28.

<sup>2</sup> Percentages are among infants who died.

NICHD Neonatal Research Network Early-Onset Sepsis Surveillance Study II (2015-2017)

**eTable 17. Mortality by Gestational Age and Birth Weight for Infants With Early Onset Infection**

|                           | n/N cases (%) |          |            |
|---------------------------|---------------|----------|------------|
|                           | All           | GBS      | E coli     |
| All deaths                | 38/235 (16)   | 4/70 (6) | 27/85 (32) |
| By gestational age, weeks |               |          |            |
| 22-28                     | 29/67 (43)    | 3/5 (60) | 20/44 (45) |
| 29-33                     | 7/50 (14)     | 1/9 (11) | 5/20 (25)  |
| 34-36                     | 2/14 (14)     | 0/3 (0)  | 2/4 (50)   |
| ≥ 37                      | 0/104 (0)     | 0/53 (0) | 0/17 (0)   |
| By birth weight, grams    |               |          |            |
| 401-1000                  | 23/50 (46)    | 2/3 (67) | 16/34 (47) |
| 1001-1500                 | 7/38 (18)     | 1/7 (14) | 5/17 (29)  |
| 1501-2500                 | 6/39 (15)     | 1/7 (14) | 4/14 (29)  |
| ≥ 2501                    | 2/108 (2)     | 0/53 (0) | 2/20 (10)  |

Data for one infant with both GBS and E coli were included in all patient data but excluded from GBS and E coli columns.  
 NICHD Neonatal Research Network Early-Onset Sepsis Surveillance Study II (2015-2017)

eFigure. How Frequently Do Infants With Early-Onset Sepsis Born to Mothers With Chorioamnionitis Appear Well at Birth

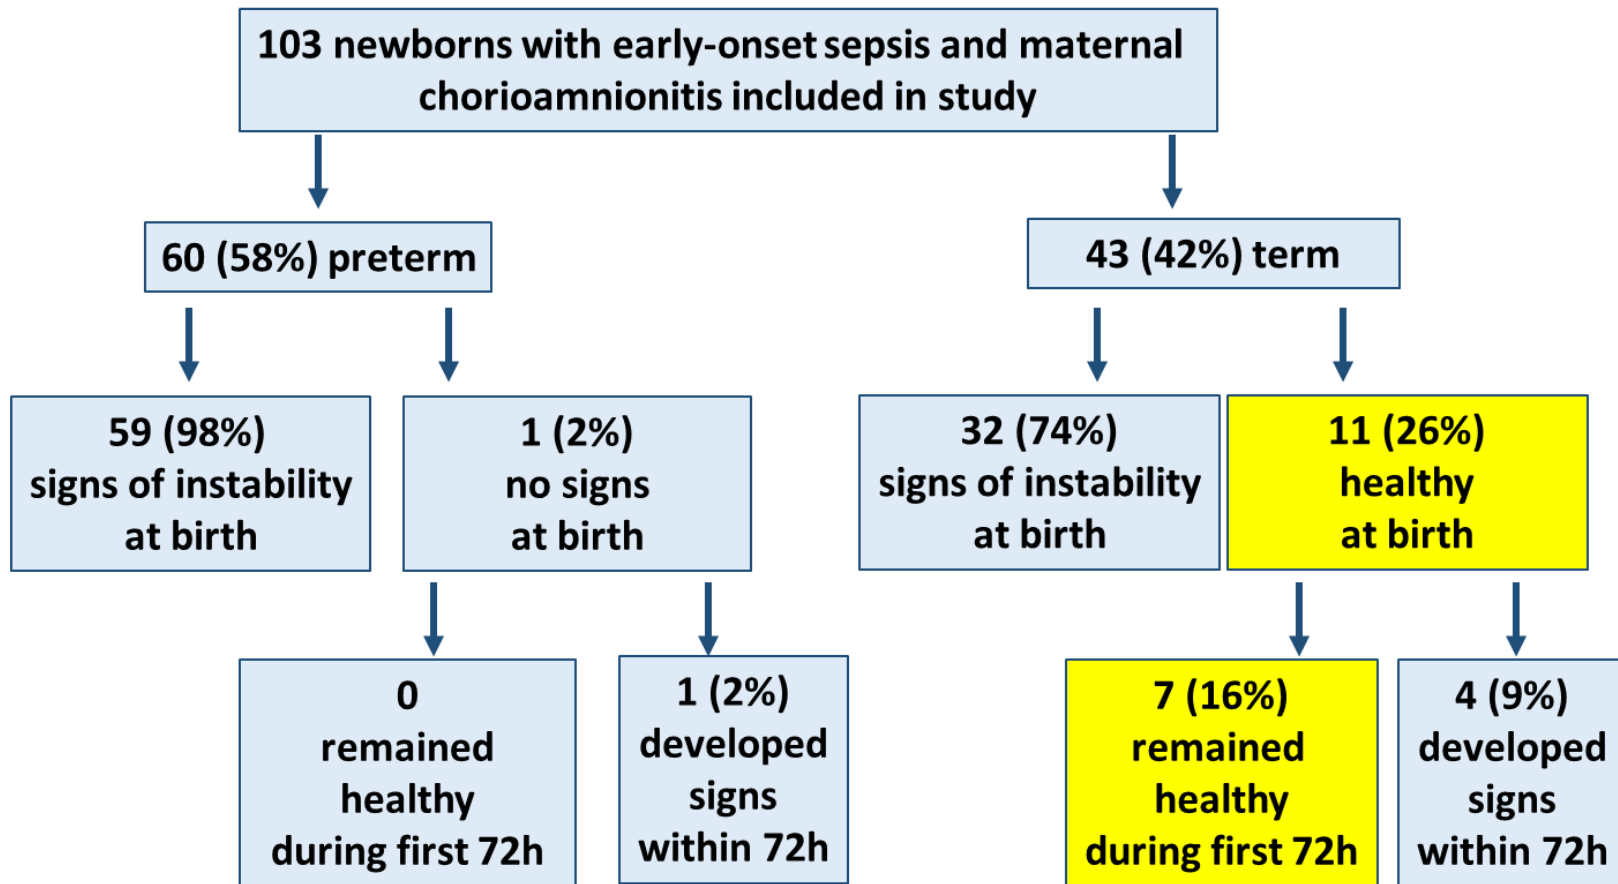

NICHD Neonatal Research Network Early-Onset Sepsis Surveillance Study II (2015-2017)
